# Supplementary material
Source: publisher site journal article supplement (https://www.dovepress.com/article/467083)
Supplement: Supplementary file 1 [file get_supplementary_file.php]

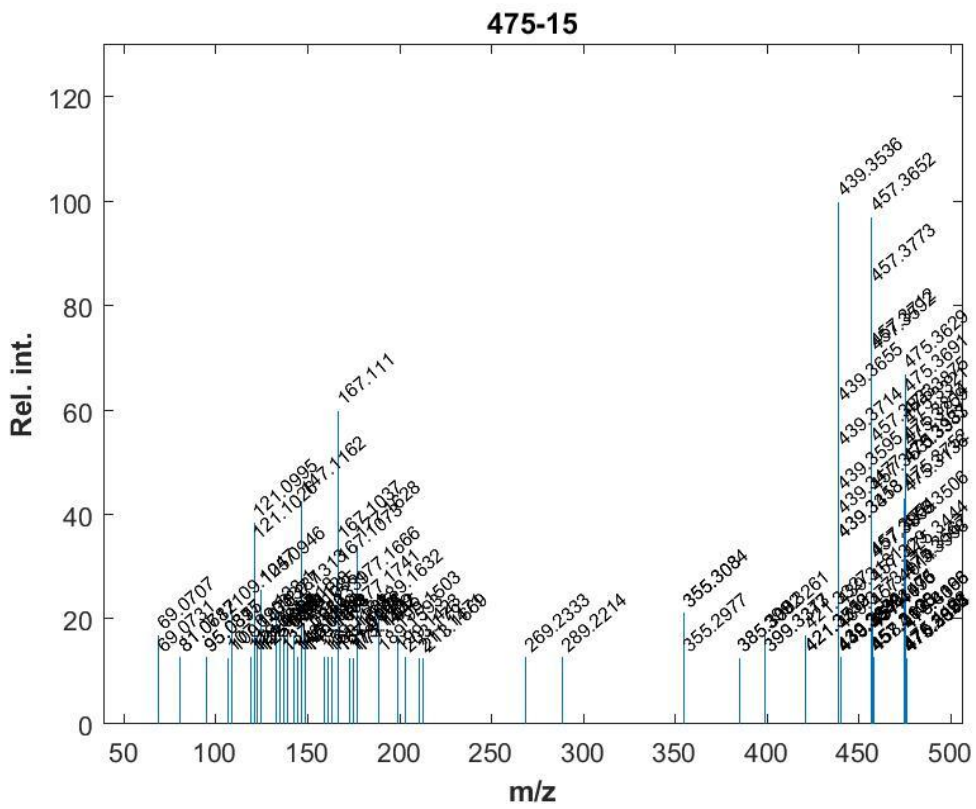

• **Supplementary figure 1**, the mass spectrum in +ve mode

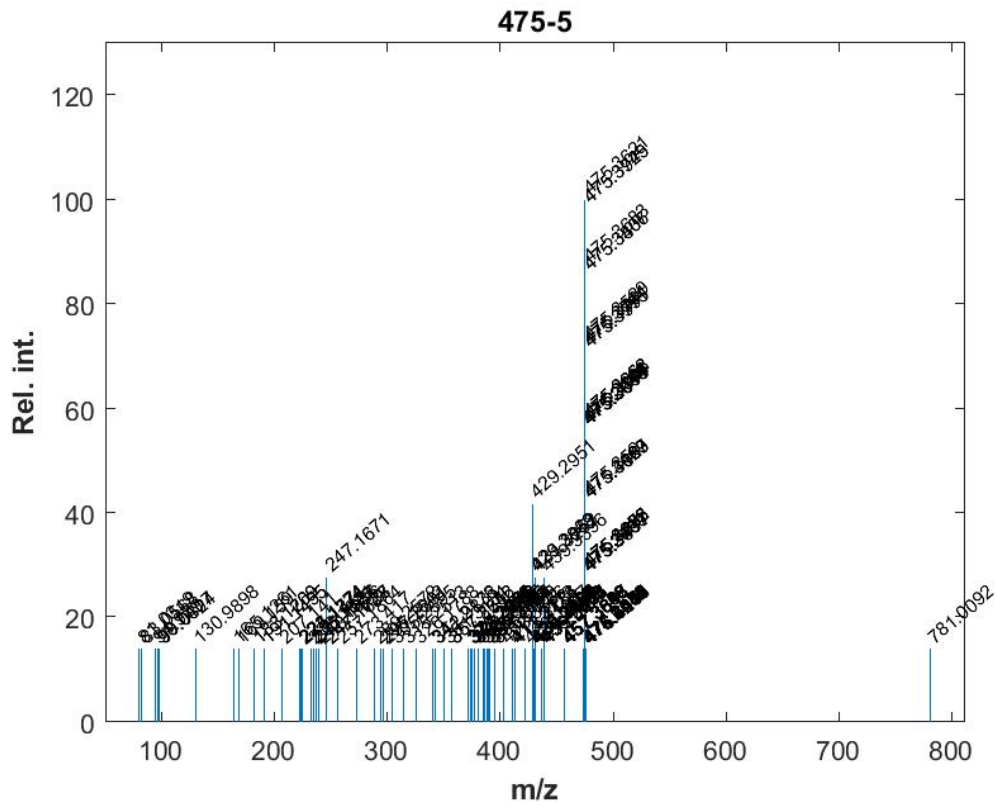

- **Supplementary figure 2**, The mass spectrum in -ve mode

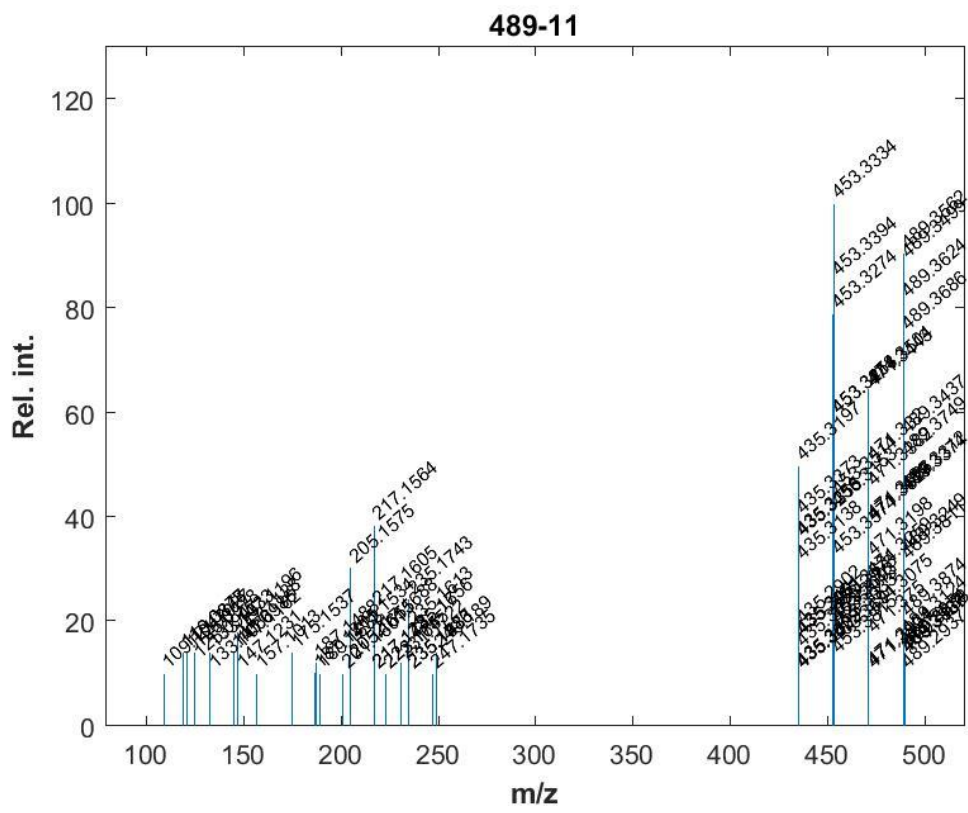

- **Supplementary figure 3**, the mass spectrum in +ve mode

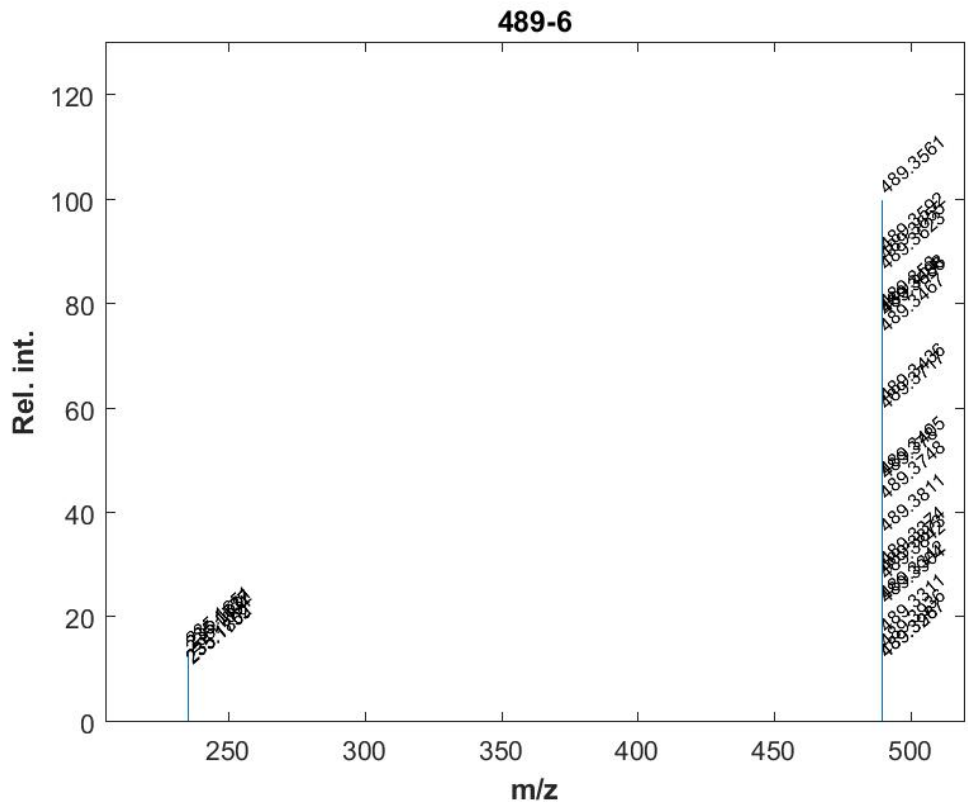

- **Supplementary figure 4**, the mass spectrum in -ve mode

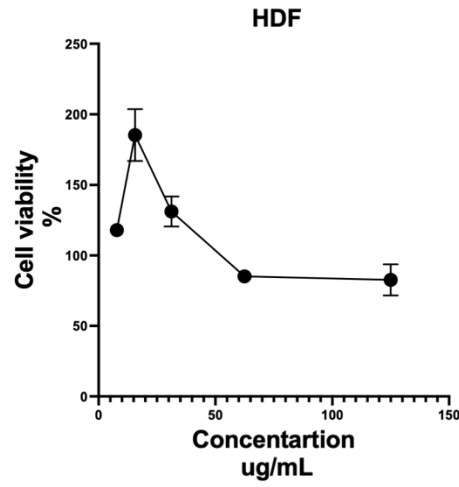

**Supplementary figure 5. Cytotoxic effect of *C. siphonella* extract on Human dermal fibroblasts (HDF).** Graphical presentation represents the percentage of cell viability on HDF cells.
